# Supplementary material for: Stochastic Simulations Suggest that HIV-1 Survives Close to Its Error Threshold
Source: PLOS journal article supplement (doi:10.1371/journal.pcbi.1002684), 2012-09-13
Supplement: S10 (10.1371/journal.pcbi.1002684.s010) [file journal.pcbi.1002684.s010]

```

1  /*
2  * project: HIV quasispecies
3  * file name: main.cc
4  * date_created: 05-Dec-2010
5  * date_modified: 10-Jul-2012
6  * version: 1.3.0
7  */
8
9  #include<stdio.h>
10 #include<cstdlib>
11 #include<math.h>
12 #include<iostream>
13 #include<time.h>
14 #include "mt19937-64.h" // Header file for Mersenne Twister random number generator
15
16 //***** SIMULATION CONTROL *****/
17 // comment lines to switch on or off specific evolutionary processes
18 #define MUTATE_ON
19 #define RECOMBINE_ON
20 #define MULT_INF_ON //also change INF_DIST
21 #define DRIFT_ON
22 //#define FOUNDER_MUTATE_ON
23 #define FITNESS_SELECTION_ON
24
25 //***** production and infection parameters *****/
26 #ifndef MULT_INF_ON
27     #define MAXINF 3 // maximum number of infections per cell (define the specific
distribution in next line)
28     #define INF_DIST {0.0,0.0,100.0} // distribution of multiply infected cells
29 #else
30     #define MAXINF 1
31     #define INF_DIST {100.0}
32 #endif
33 #ifndef DRIFT_ON // multiple virions produced per cell
34     #define MAXPRODUCE 10 // number of offspring viruses from each infected cell
35 #else
36     #define MAXPRODUCE 1
37 #endif
38
39 //***** simulation parameters *****/
40 #define MAXCYCLE 10000 // maximum number of generations
41 #define MAXRUNS 5 // maximum runs
42
43 //***** system parameters *****/
44 #define L 10000 // Length of RNA sequence
45 #define MAXCELL 2400 // total number of cells
46 #define MAXVIRUS (MAXCELL*MAXPRODUCE) // total number of viruses
47
48 //***** evolution parameters *****/
49 #ifndef MUTATE_ON // set specific mutation rate if MUTATE_ON switch is defined or set
mutation rate to zero
50     #define MUTATEINDEX 1.0e-3 // mutation rate (substitutions per site per replication)
51 #else
52     #define MUTATEINDEX 0.0
53 #endif
54
55 #ifndef RECOMBINE_ON
56     #define RECOMBINEINDEX 8.3e-4 // recombination rate (crossovers per site per
replication)
57 #else
58     #define RECOMBINEINDEX 0.0
59 #endif
60
61 #ifndef FOUNDER_MUTATE_ON
62     #define FOUNDER_MUTATE_FRAC 0.1 // fraction of sites mutated from fittest sequence to
form founder sequence
63 #else
64     #define FOUNDER_MUTATE_FRAC 0.0
65 #endif
66
67 #ifndef FITNESS_SELECTION_ON // calculate fitness of viruses if FITNESS_SELECTION_ON
switch is defined or set virus fitness to 1.0
68     #define VIRAL_FITNESS fitness(i)
69 #else
70     #define VIRAL_FITNESS 1.0
71 #endif
72

```

```

73 //**** viral fitness parameters ****#
74 #define fMIN 0.2433 // minimum viral fitness
75 #define N 3.0 // Hill coefficient
76 #define d50 30.3 // Hamming distance for which viral fitness is half maximal
77
78 using namespace std;
79
80 double percent_mult_inf[MAXINF] = INF_DIST;
81 int mult_inf[MAXINF] = {0};
82 int quasi_structure[L+1] = {0};
83 FILE *fp_quasi;
84
85 // virus class
86 class c_virus
87 {
88 public:
89     int DNA[2*L]; // array containing two viral RNA sequences of length L
90     double fitness; // fitness of virus
91     bool available; // flag indicating whether virus is available for infection
92     c_virus(); // virus constructor
93 };
94
95 // virus class constructor (Default values when a virus is created)
96 c_virus::c_virus()
97 {
98     for (int i=0;i<2*L;i++)
99     {
100         DNA[i] = 0; // set all nucleotides to A initially (0,1,2,3 corresponds to A, C, G
and T respectively)
101     }
102     fitness = 1.0;
103     available = true;
104 }
105
106 c_virus virus[MAXVIRUS]; // array containing viruses
107 c_virus fittest_virus;
108 c_virus founder_virus;
109
110 // T-cell class
111 class c_cell:public c_virus
112 {
113 public:
114     c_virus V[MAXINF]; // array containing viruses that infected the cell
115     int provirus[MAXINF][L]; // array for proviral DNA sequence
116     int multinf; // present multiple infection status of cell
117
118     void infect(int v,int inf); // function to infect the cell by virus with index
number 'v' at multiple infection status 'inf'
119     void mutate(); // function to mutate proviral sequence
120     void recombine(); // function to create proviral sequence from viral RNA sequences by
recombination
121 };
122
123 c_cell cell[MAXCELL]; // array containing cells
124
125 // infect cell by virus with index number 'v' at multiple infection status 'inf'
126 void c_cell::infect(int v,int inf)
127 {
128     // copy viral RNA sequence into cell
129     for (int i=0;i<2*L;i++)
130     {
131         V[inf].DNA[i]=:virus[v].DNA[i];
132     }
133
134     multinf = multinf+1; // increase multiple infection status by 1
135     //printf("multinf = %d ",multinf);
136 }//end of c_cell::infect()
137
138 // function to mutate proviral sequence
139 void c_cell::mutate()
140 {
141     int ch_no = 2;
142     // loop over present cell's multiple infection status (equal to number of proviral
sequences)
143     for(int i=0;i<multinf;i++)
144     {
145         // loop over proviral sequence length

```

```

146     for (int j=0;j<L;j++)
147     {
148         // if random number is less than mutation rate change the nucleotide by 2 (A
<-> G and C <-> T : only transitions are considered)
149         if (rand_no()<MUTATEINDEX)
150         {
151             //printf("mutation occurred for provirus %d, position %d \n",i,j);
152             provirus[i][j] = (provirus[i][j]+ch_no)%4;
153         }
154     }
155 } //end of c_cell::mutate()
156
157
158
159 // function to create proviral DNA sequence from viral RNA sequence by recombination
160 void c_cell::recombine()
161 {
162     // loop over present multiple infection status
163     for (int i=0;i<multinf;i++)
164     {
165         int strand = 1;
166
167         // select first or second strand randomly
168         if (rand_no()>0.5)
169             strand = 1;
170         else
171             strand = 2;
172
173         // loop over proviral DNA sequence length
174         for (int j=0;j<L;j++)
175         {
176             // if random number is less than recombination rate switch sequence
177             if (rand_no() < RECOMBINEINDEX)
178             {
179                 //printf("recombination occurred for provirus %d, position %d \n",i,j);
180                 if (strand == 1)
181                     strand = 2;
182                 else
183                     strand = 1;
184             }
185
186             // copy nucleotide from selected viral RNA strand to proviral DNA sequence
187             if (strand == 1)
188             {
189                 provirus[i][j] = V[i].DNA[j];
190             }
191             else
192             {
193                 provirus[i][j] = V[i].DNA[L+j];
194             }
195         }
196     }
197 }
198
199
200 int main()
201 {
202     //int i,j,k;
203     int tempv;
204     int v1,v2;
205     int vcount;
206     int virus_prod_count = 0;
207
208     double fittest_virus_fitness = 0.0; // fitness of fittest virus in current generation
209
210
211     int time_now;
212     time_t rawtime;
213     struct tm * timeinfo;
214     cout<<"Time of Start is"<<int(time(0))<<endl; // simulation start time
215
216     time_now = int(time(0));
217     time( &rawtime);
218     timeinfo = localtime ( &rawtime );
219     cout<<"Date : "<<asctime(timeinfo); // simulation start date and time
220
221     srand((long int)time(0)); // initialize random number generator

```

```

222
223 void display_viral_sequences();
224 void display_proviral_sequences();
225
226 double fitness(int v); // function to calculate fitness
227 void cal_quasi_structure(); // function to calculate quasispecies structure
228
229 void initialize_virus(); // clear information in all viruses
230 void initialize_cell(); // clear information in all cells
231 void initialize_fittest_virus(); // create fittest virus
232 void initialize_founder_virus(); // create founder virus
233
234 // file pointer for simulation result summary
235 FILE *fp_result;
236
237 if ((fp_result = fopen("result.txt","a+"))==NULL)
238 {
239     printf("error in opening result.txt \n");
240 }
241
242 if ((fp_quasi = fopen("quasi_structure.txt","a+"))==NULL)
243 {
244     printf("error in opening quasi_structure.txt \n");
245 }
246
247 fprintf(fp_result, "%d\nSTART: %s\n", time_now, asctime(timeinfo));
248
249 printf("L=%d, cell=%d, Maxruns=%d, Maxcycles=%d, Maxinf=%d, Maxprod=%d,
mutateindex=%lf, recombine index=%lf, FOUNDER_MUTATE_FRAC=%lf \n", L, MAXCELL, MAXRUNS,
MAXCYCLE, MAXINF, MAXPRODUCE, MUTATEINDEX, RECOMBINEINDEX, FOUNDER_MUTATE_FRAC);
250
251 fprintf(fp_result, "L=%d, cell=%d, Maxruns=%d, Maxcycles=%d, Maxinf=%d, Maxprod=%d,
mutateindex=%lf, recombine index=%lf, FOUNDER_MUTATE_FRAC=%lf \n", L, MAXCELL, MAXRUNS,
MAXCYCLE, MAXINF, MAXPRODUCE, MUTATEINDEX, RECOMBINEINDEX, FOUNDER_MUTATE_FRAC);
252
253 // display various switches' status
254 #ifdef MUTATE_ON
255     fprintf(fp_result, "MUTATION_ON\n");
256     printf("MUTATION_ON\n");
257 #endif
258 #ifndef MUTATE_ON
259     fprintf(fp_result, "MUTATION_OFF\n");
260     printf("MUTATION_OFF\n");
261 #endif
262
263 #ifdef RECOMBINE_ON
264     fprintf(fp_result, "RECOMBINATION_ON\n");
265     printf("RECOMBINATION_ON\n");
266 #endif
267 #ifndef RECOMBINE_ON
268     fprintf(fp_result, "RECOMBINATION_OFF\n");
269     printf("RECOMBINATION_OFF\n");
270 #endif
271
272 #ifdef MULT_INF_ON
273     fprintf(fp_result, "MULT_INF_ON\n");
274     printf("MULT_INF_ON\n");
275 #endif
276 #ifndef MULT_INF_ON
277     fprintf(fp_result, "MULT_INF_OFF\n");
278     printf("MULT_INF_OFF\n");
279 #endif
280
281 #ifdef DRIFT_ON
282     fprintf(fp_result, "DRIFT_ON\n");
283     printf("DRIFT_ON\n");
284 #endif
285 #ifndef DRIFT_ON
286     fprintf(fp_result, "DRIFT_OFF\n");
287     printf("DRIFT_OFF\n");
288 #endif
289
290 #ifdef FOUNDER_MUTATE_ON
291     fprintf(fp_result, "FOUNDER_MUTATE_ON\n");
292     printf("FOUNDER_MUTATE_ON\n");
293 #endif
294 #ifndef FOUNDER_MUTATE_ON

```

```

295     fprintf(fp_result, "FOUNDER_MUTATE_OFF\n");
296     printf("FOUNDER_MUTATE_OFF\n");
297 #endif
298
299 #ifdef FITNESS_SELECTION_ON
300     fprintf(fp_result, "FITNESS_SELECTION_ON\n");
301     printf("FITNESS_SELECTION_ON\n");
302 #endif
303 #ifndef FITNESS_SELECTION_ON
304     fprintf(fp_result, "FITNESS_SELECTION_OFF\n");
305     printf("FITNESS_SELECTION_OFF\n");
306 #endif
307
308 /******
309
310 // calculate the number of cells of each multiple infected type from multiple infection
distribution
311 mult_inf[MAXINF-1] = MAXCELL;
312 for(int i=0;i<MAXINF-1;i++)
313 {
314     mult_inf[i] = (int)rint(MAXCELL*percent_mult_inf[i]/100);
315     printf("mult_inf[%d]=%d \n", i, mult_inf[i]);
316     mult_inf[MAXINF-1] = mult_inf[MAXINF-1]-mult_inf[i];
317 }
318
319     printf("mult_inf[%d]=%d \n", MAXINF-1, mult_inf[MAXINF-1]);
320
321 // display multiple infection cell numbers
322 for (int i=0;i<MAXINF;i++)
323 {
324     fprintf(fp_result, "mult_inf = %d \t percentage = %lf \t mult_inf_cells = %d\n", i+1,
percent_mult_inf[i], mult_inf[i]);
325 }
326
327 // loop over simulation runs
328 for (int run=1;run<=MAXRUNS;run++)
329 {
330     init_genrand64((unsigned long long)(rand())); //initialize Mersenne Twister random
number generator with a random number generated from GCC random number generator
331     //printf("run =%d \n", run+1);
332
333     /***** system initialization *****/
334     initialize_virus();
335     initialize_cell();
336
337     initialize_fittest_virus(); // create fittest virus
338     initialize_founder_virus(); // create founder virus
339
340     /***** simulation start *****/
341     // loop over generations
342     for (int cycle=1;cycle<=MAXCYCLE;cycle++)
343     {
344
345         //printf("\n\n cycle start proviral sequences \n");
346         //display_proviral_sequences();
347
348         /****** INFECTION *****/
349         //printf("infecting \n");
350         initialize_cell(); // clear all cell information to prepare for next round of
infection
351         int cell_count = 0;
352
353         for (int i=1;i<=MAXINF;i++) // loop over multiple infected type
354         {
355             for(int j=0;j<mult_inf[i-1];j++) // loop over cells of each multiple
infected type
356             {
357                 for (int inf=0;inf<i;inf++) // loop over number of multiple infections in
each cell
358                 {
359                     do
360                     {
361                         tempv = (int)(rand_no()*MAXVIRUS); // select a virus randomly from
surviving viral pool
362                     }
363                     while (virus[tempv].available==false);
364

```

```

365         //printf("cell_count=%d ",cell_count);
366         cell[cell_count].infect(tempv,inf); // infect the cell with the
selected virus
367         virus[tempv].available = false; // set infecting virus to false so that
it is not available for further infections
368         //printf("%d \n",tempv);
369     }
370     //printf(" ");
371     cell_count++; // increment cell count
372 }
373 }
374 //printf("\n");
375
376 /*
377 printf("cell multiple infection status \n");
378 for(int i=0;i<MAXCELL;i++)
379 {
380     printf("%d ",cell[i].multinf);
381 }
382 printf("\n");
383 */
384
385 // set all viruses as not available, once infection process is complete
386 for (int i=0;i<MAXVIRUS;i++)
387 {
388     virus[i].available = false;
389 }
390
391
392 /***** RECOMBINATION & MUTATION *****/
393 for (int i=0;i<MAXCELL;i++) // loop over all cells
394 {
395     //printf("cell=%d ",i);
396     cell[i].recombine(); // perform recombination to produce proviral DNA from
viral RNA
397     cell[i].mutate(); // perform mutation on proviral DNA
398 }
399
400 //printf("\n\nproviral sequences \n");
401 //display_proviral_sequences(); //after infection & reverse transcription
402
403
404 /***** PRODUCTION *****/
405 //printf("produced ");
406 virus_prod_count = 0;
407 for (int i=0;i<MAXCELL;i++) // loop over all cells
408 {
409     for (int prod=0;prod<MAXPRODUCE;prod++) // loop over viral production per
cell
410     {
411         do
412         {
413             // select a virus position from viral pool to copy offspring virus
414             // if the viral position is not already occupied
415             tempv = (int)(rand_no()*MAXVIRUS);
416         }
417         while (virus[tempv].available == true);
418
419         // select two proviral DNA strands existing inside cell randomly to
copy into new offspring virus
420         v1 = (int)(rand_no()*cell[i].multinf);
421         v2 = (int)(rand_no()*cell[i].multinf);
422         //printf("cell=%d,%d virus=%d provirus=%d,%d \n",i,prod,tempv,v1,v2);
423
424         // copy proviral DNA strands to viral RNA strands
425         for (int l=0;l<L;l++)
426         {
427             virus[tempv].DNA[l] = cell[i].provirus[v1][l];
428             virus[tempv].DNA[L+l] = cell[i].provirus[v2][l];
429         }
430         virus[tempv].available = true; // set the virus as available for
infection
431
432         virus_prod_count++; // increment viral production count
433         //printf("%d ",tempv);
434     }
435     //printf(" ");

```

```

436
437
438     //printf("\n\n");
439
440     //printf("proviral sequences \n");
441     //display_proviral_sequences(); //at the end of each cycle
442     //printf("\n\n viral sequences \n");
443     //display_viral_sequences(); //at the end of each cycle
444
445     // display information regarding current generation and simulation run
446     cout<<"run="<< run << ",cycle="<< cycle <<endl;
447     //printf("run=%d cycle=%d \n",run,cycle);
448
449     // calculate quasispecies structure of proviral DNA pool
450     cal_quasi_structure();
451
452     /***** FITNESS SELECTION *****/
453     fittest_virus_fitness = 0.0; // set fittest virus fitness to zero
454     for (int i=0;i<MAXVIRUS;i++) // loop over all viruses
455     {
456         virus[i].fitness = VIRAL_FITNESS; //fitness(i); calculate virus fitness
457         //printf("fitness of virus[%d]=%lf \n",i,virus[i].fitness);
458
459         // if the virus fitness is larger than fittest virus fitness
460         // set fittest virus fitness value to present virus fitness value
461         if(fittest_virus_fitness < virus[i].fitness)
462         {
463             fittest_virus_fitness = virus[i].fitness;
464         }
465     }
466
467     vcount=0;
468
469     // fitness selection of viruses
470     for (int i=0;i<MAXVIRUS;i++) // loop over all viruses
471     {
472         // if random number is greater than viral fitness normalized by the
473         fittest virus fitness
474         // then set present virus as not available for infection
475         if (rand_no()>(virus[i].fitness/fittest_virus_fitness))
476         {
477             //printf("virus %d not available \n",i);
478             virus[i].available = false;
479             vcount++;
480         }
481     }
482
483     cout<<"no of viruses surviving " <<(virus_prod_count-vcount)<<endl;
484     //printf("no of viruses surviving %d \n",(MAXVIRUS-vcount));
485
486     // flush file buffers for immediate data writing to file
487     fflush(fp_result);
488     fflush(fp_quasi);
489     } /***** end of cycle *****/
490
491     //display_viral_sequences(); //at the end of each run
492
493     } /***** end of runs *****/
494
495     // Time of simulation end
496     cout<<"Time of Ending is"<<int(time(0))<<endl;
497     time( &rawtime);
498     timeinfo = localtime ( &rawtime );
499
500     cout<<"Date : "<<asctime(timeinfo); // date and time at the end of simulation
501     fprintf(fp_result, "\n\n%d\nEND: %s \n",int(time(0)),asctime(timeinfo));
502
503     // close all simulation result files
504     fclose(fp_result);
505     fclose(fp_quasi);
506
507     return(0);
508 } //end of main
509 /*****
510
511

```

```

512 void display_viral_sequences()
513 {
514     for (int i=0;i<MAXVIRUS;i++)
515     {
516         for (int j=0;j<2*L;j++)
517         {
518             printf("%d\t",virus[i].DNA[j]);
519         }
520         printf("\n");
521     }
522 }
523
524 void display_proviral_sequences()
525 {
526     for (int i=0;i<MAXCELL;i++)
527     {
528         //for (int j=0;j<MAXINF;j++)
529         for (int j=0;j<cell[i].multinf;j++)
530         {
531             printf("cell=%d provirus=%d\n",i,j);
532             for (int l=0;l<L;l++)
533             {
534                 printf("%d\t",cell[i].provirus[j][l]);
535             }
536             printf("\n");
537         }
538         printf("\n");
539     }
540 }
541
542 // calculate quasispecies structure
543 void cal_quasi_structure()
544 {
545     int hamming = 0;
546     long int nprovirus = 0;
547     long int count = 0;
548
549     for(int l=0;l<=L;l++)
550     {
551         quasi_structure[l] = 0;
552     }
553
554     for (int i=0;i<MAXCELL;i++) // loop over all cells
555     {
556         for(int j=0;j<cell[i].multinf;j++) // loop over number of proviruses in each cell
557         {
558             count++;
559             hamming = 0;
560             for (int k=0;k<L;k++) // loop over proviral DNA length
561             {
562                 // calculate number of differences between fittest virus
563                 // and present provirus for classification into hamming classes
564                 if (cell[i].provirus[j][k] != fittest_virus.DNA[k])
565                     hamming++;
566                 //printf("hamming = %d \n",hamming);
567             }
568             // increment hamming class count by 1 in quasispecies structure
569             quasi_structure[hamming] = quasi_structure[hamming] + 1;
570         }
571     }
572
573     // sum to calculate total number of proviruses in all cells
574     for(int inf=0;inf<MAXINF;inf++)
575     {
576         nprovirus = nprovirus + mult_inf[inf]*(inf+1);
577     }
578
579     //printf("nprovirus = %d count = %d\n",nprovirus,count);
580
581     // store quasispecies structure into file
582     for(int len=0;len<=L;len++)
583     {
584         fprintf(fp_quasi,"%d \t",quasi_structure[len]);
585         //printf("%d \t",quasi_structure[len]);
586     }
587     fprintf(fp_quasi,"\n");
588

```



```

589 }
590
591 // set all viral nucleotides to A for all viruses
592 void initialize_virus()
593 {
594     for (int i=0;i<MAXVIRUS;i++)
595     {
596         for (int j=0;j<2*L;j++)
597         {
598             virus[i].DNA[j] = 0;
599         }
600     }
601 }
602
603 // create fittest virus
604 void initialize_fittest_virus()
605 {
606     double rand = 0.0;
607
608     // select each nucleotide position uniformly from A, G, C and T
609     for (int k=0;k<L;k++)
610     {
611         rand = rand_no();
612
613         if (rand < 0.25)
614         {
615             fittest_virus.DNA[k] = 0;
616             fittest_virus.DNA[L+k] = 0;
617         }
618         else if (rand < 0.50)
619         {
620             fittest_virus.DNA[k] = 1;
621             fittest_virus.DNA[L+k] = 1;
622         }
623         else if (rand < 0.75)
624         {
625             fittest_virus.DNA[k] = 2;
626             fittest_virus.DNA[L+k] = 2;
627         }
628         else
629         {
630             fittest_virus.DNA[k] = 3;
631             fittest_virus.DNA[L+k] = 3;
632         }
633     }
634
635     fittest_virus.fitness = 1.0;
636 }
637
638 // create founder virus
639 void initialize_founder_virus()
640 {
641     long int hamming = 0;
642     int ch_no = 2;
643     int rand_pos;
644
645     for(int j=0;j<L;j++) //copying of fittest virus to founder virus
646     {
647         founder_virus.DNA[j] = fittest_virus.DNA[j];
648         founder_virus.DNA[L+j] = fittest_virus.DNA[L+j];
649     }
650
651     /* mutating fraction of first virus genome length */
652     for (int count=0;count<(L*FOUNDER_MUTATE_FRAC);)
653     {
654         rand_pos = (int)(rand_no()*L);
655         //cout<<rand_pos<<" ";
656         if(founder_virus.DNA[rand_pos] != fittest_virus.DNA[rand_pos])
657             continue;
658         else
659         {
660             founder_virus.DNA[rand_pos] = (fittest_virus.DNA[rand_pos]+ch_no)%4;
661             founder_virus.DNA[L+rand_pos] = (fittest_virus.DNA[L+rand_pos]+ch_no)%4;
662             count++;
663         }
664     }
665 }

```

```

666
667     /* founder virus fitness calculation */
668     for(int i=0;i<2*L;i++)
669     {
670         if (founder_virus.DNA[i] != fittest_virus.DNA[i])
671             hamming++;
672     }
673
674     hamming = (long int)(hamming/2.0);
675
676     founder_virus.fitness = 1.0 - (1.0-fMIN)*pow(hamming,N)/(pow(hamming,N) + pow(d50,N));
677
678     /* copy founder_virus to initial viral pool */
679     for (int i=0;i<MAXVIRUS;i++)
680     {
681         for(int j=0;j<2*L;j++)
682         {
683             virus[i].DNA[j] = founder_virus.DNA[j];
684         }
685
686         virus[i].fitness = founder_virus.fitness;
687         virus[i].available = true;
688     }
689 }
690
691 // set all viral and proviral sequences to zero in all cells
692 void initialize_cell()
693 {
694     for (int i=0;i<MAXCELL;i++)
695     {
696         for (int j=0;j<MAXINF;j++)
697         {
698             for (int k=0;k<L;k++)
699             {
700                 cell[i].V[j].DNA[k] = 0;
701                 cell[i].V[j].DNA[L+k] = 0;
702                 cell[i].provirus[j][k] = 0;
703             }
704         }
705         cell[i].multinf = 0;
706     }
707 }
708
709 // calculate fitness of virus with index number 'v'
710 double fitness(int v)
711 {
712     long int hamming = 0;
713     double fitness = 0.0;
714
715     for (int i=0;i<2*L;i++)
716     {
717         if (virus[v].DNA[i] != fittest_virus.DNA[i])
718             hamming++;
719     }
720
721     hamming = (long int)(hamming/2.0);
722
723     fitness = 1.0 - (1.0-fMIN)*pow(hamming,N)/(pow(hamming,N) + pow(d50,N));
724
725     //printf("hamming value = %d fitness = %lf \n",hamming,fitness);
726     return(fitness);
727 }
728
729
730

```

```

1  /*
2  * project: HIV quasispecies
3  * file name: mt19937-64.h
4  * date: 31-10-08
5  * version: 9.2
6  * remarks: changed the name of the function "genrand64_real2(void)" to "rand_no(void)"
7  */
8
9  #ifndef MT1993764_H_
10 #define MT1993764_H_
11
12 /*
13  A C-program for MT19937-64 (2004/9/29 version).
14  Coded by Takuji Nishimura and Makoto Matsumoto.
15
16  This is a 64-bit version of Mersenne Twister pseudorandom number
17  generator.
18
19  Before using, initialize the state by using init_genrand64(seed)
20  or init_by_array64(init_key, key_length).
21
22  Copyright (C) 2004, Makoto Matsumoto and Takuji Nishimura,
23  All rights reserved.
24
25  Redistribution and use in source and binary forms, with or without
26  modification, are permitted provided that the following conditions
27  are met:
28
29  1. Redistributions of source code must retain the above copyright
30  notice, this list of conditions and the following disclaimer.
31
32  2. Redistributions in binary form must reproduce the above copyright
33  notice, this list of conditions and the following disclaimer in the
34  documentation and/or other materials provided with the distribution.
35
36  3. The names of its contributors may not be used to endorse or promote
37  products derived from this software without specific prior written
38  permission.
39
40  THIS SOFTWARE IS PROVIDED BY THE COPYRIGHT HOLDERS AND CONTRIBUTORS
41  "AS IS" AND ANY EXPRESS OR IMPLIED WARRANTIES, INCLUDING, BUT NOT
42  LIMITED TO, THE IMPLIED WARRANTIES OF MERCHANTABILITY AND FITNESS FOR
43  A PARTICULAR PURPOSE ARE DISCLAIMED. IN NO EVENT SHALL THE COPYRIGHT OWNER OR
44  CONTRIBUTORS BE LIABLE FOR ANY DIRECT, INDIRECT, INCIDENTAL, SPECIAL,
45  EXEMPLARY, OR CONSEQUENTIAL DAMAGES (INCLUDING, BUT NOT LIMITED TO,
46  PROCUREMENT OF SUBSTITUTE GOODS OR SERVICES; LOSS OF USE, DATA, OR
47  PROFITS; OR BUSINESS INTERRUPTION) HOWEVER CAUSED AND ON ANY THEORY OF
48  LIABILITY, WHETHER IN CONTRACT, STRICT LIABILITY, OR TORT (INCLUDING
49  NEGLIGENCE OR OTHERWISE) ARISING IN ANY WAY OUT OF THE USE OF THIS
50  SOFTWARE, EVEN IF ADVISED OF THE POSSIBILITY OF SUCH DAMAGE.
51
52  References:
53  T. Nishimura, ``Tables of 64-bit Mersenne Twisters''
54  ACM Transactions on Modeling and
55  Computer Simulation 10. (2000) 348--357.
56  M. Matsumoto and T. Nishimura,
57  ``Mersenne Twister: a 623-dimensionally equidistributed
58  uniform pseudorandom number generator''
59  ACM Transactions on Modeling and
60  Computer Simulation 8. (Jan. 1998) 3--30.
61
62  Any feedback is very welcome.
63  http://www.math.hiroshima-u.ac.jp/~m-mat/MT/emt.html
64  email: m-mat @ math.sci.hiroshima-u.ac.jp (remove spaces)
65  */
66
67
68 #include <stdio.h>
69
70 #define NN 312
71 #define MM 156
72 #define MATRIX_A 0xB5026F5AA96619E9ULL
73 #define UM 0xFFFFFFFFF8000000ULL /* Most significant 33 bits */
74 #define LM 0x7FFFFFFFULL /* Least significant 31 bits */
75
76
77 /* The array for the state vector */

```

```

78 static unsigned long long mt[NN];
79 /* mti==NN+1 means mt[NN] is not initialized */
80 static int mti=NN+1;
81
82 /* initializes mt[NN] with a seed */
83 void init_genrand64(unsigned long long seed)
84 {
85     mt[0] = seed;
86     for (mti=1; mti<NN; mti++)
87         mt[mti] = (6364136223846793005ULL * (mt[mti-1] ^ (mt[mti-1] >> 62)) + mti);
88 }
89
90 /* initialize by an array with array-length */
91 /* init_key is the array for initializing keys */
92 /* key_length is its length */
93 //unsigned long long init_key[], key_length;
94 void init_by_array64(unsigned long long init_key[], unsigned long long key_length)
95 {
96     unsigned long long i, j, k;
97     init_genrand64(19650218ULL);
98     i=1; j=0;
99     k = (NN>key_length ? NN : key_length);
100    for (; k; k--) {
101        mt[i] = (mt[i] ^ ((mt[i-1] ^ (mt[i-1] >> 62)) * 3935559000370003845ULL))
102            + init_key[j] + j; /* non linear */
103        i++; j++;
104        if (i>=NN) { mt[0] = mt[NN-1]; i=1; }
105        if (j>=key_length) j=0;
106    }
107    for (k=NN-1; k; k--) {
108        mt[i] = (mt[i] ^ ((mt[i-1] ^ (mt[i-1] >> 62)) * 2862933555777941757ULL))
109            - i; /* non linear */
110        i++;
111        if (i>=NN) { mt[0] = mt[NN-1]; i=1; }
112    }
113
114    mt[0] = 1ULL << 63; /* MSB is 1; assuring non-zero initial array */
115 }
116
117 /* generates a random number on [0, 2^64-1]-interval */
118 unsigned long long genrand64_int64(void)
119 {
120     int i;
121     unsigned long long x;
122     static unsigned long long mag01[2]={0ULL, MATRIX_A};
123
124     if (mti >= NN) { /* generate NN words at one time */
125
126         /* if init_genrand64() has not been called, */
127         /* a default initial seed is used */
128         if (mti == NN+1)
129             init_genrand64(5489ULL);
130
131         for (i=0; i<NN-MM; i++) {
132             x = (mt[i]&UM)|(mt[i+1]&LM);
133             mt[i] = mt[i+MM] ^ (x>>1) ^ mag01[(int)(x&1ULL)];
134         }
135         for (; i<NN-1; i++) {
136             x = (mt[i]&UM)|(mt[i+1]&LM);
137             mt[i] = mt[i+(MM-NN)] ^ (x>>1) ^ mag01[(int)(x&1ULL)];
138         }
139         x = (mt[NN-1]&UM)|(mt[0]&LM);
140         mt[NN-1] = mt[MM-1] ^ (x>>1) ^ mag01[(int)(x&1ULL)];
141
142         mti = 0;
143     }
144
145     x = mt[mti++];
146
147     x ^= (x >> 29) & 0x5555555555555555ULL;
148     x ^= (x << 17) & 0x71D67FFFEDA60000ULL;
149     x ^= (x << 37) & 0xFFF7EEE000000000ULL;
150     x ^= (x >> 43);
151
152     return x;
153 }
154

```

```

155  /* generates a random number on [0, 2^63-1]-interval */
156  long long genrand64_int63(void)
157  {
158      return (long long)(genrand64_int64() >> 1);
159  }
160
161  /* generates a random number on [0,1]-real-interval */
162  double genrand64_real1(void)
163  {
164      return (genrand64_int64() >> 11) * (1.0/9007199254740991.0);
165  }
166
167  /* generates a random number on [0,1)-real-interval */
168  //double genrand64_real2(void) ( ***** modification to function name ***** )
169  double rand_no(void)
170  {
171      return (genrand64_int64() >> 11) * (1.0/9007199254740992.0);
172  }
173
174  /* generates a random number on (0,1)-real-interval */
175  double genrand64_real3(void)
176  {
177      return ((genrand64_int64() >> 12) + 0.5) * (1.0/4503599627370496.0);
178  }
179
180  /*
181  int main(void)
182  {
183      int i;
184      unsigned long long init[4]={0x12345ULL, 0x23456ULL, 0x34567ULL, 0x45678ULL}, length=4;
185      init_by_array64(init, length);
186      printf("1000 outputs of genrand64_int64()\n");
187      for (i=0; i<1000; i++) {
188          printf("%20llu ", genrand64_int64());
189          if (i%5==4) printf("\n");
190      }
191      printf("\n1000 outputs of genrand64_real2()\n");
192      for (i=0; i<1000; i++) {
193          printf("%10.8f ", genrand64_real2());
194          if (i%5==4) printf("\n");
195      }
196      return 0;
197  }
198
199  */
200
201  #endif /*MT1993764_H_*/
202

```
